# Supplementary material
Source: Research Square preprint supplement (doi:10.21203/rs.3.rs-9150525/v1)
Supplement: Supplementary file 1 [file ec441e6c5747cd5e20acc678.docx]

ANNEX1

Table: In Vivo Coding

| Sr No | Themes | Sub-themes |
| --- | --- | --- |
| 1 | Project related Issues | -Technical/ Mechanical Issues  -Quality of Machinery |
| 2 | Organizational & Financial Issues | -Management of the project  -Savings from the project  -Cost of the project |
| 3 | Support from Local Politicians/ Government |  |
| 4 | Electricity Access | -Quality of electricity  -Access to electricity  -Alternate Source of Electricity |
| 5 | Women participation |  |
| 6 | AKRSP dominating electricity and other services |  |
| 7 | Sustainability of the project/future planning | -Community conflicts  -Community mobilization  -Ownership of the project  -Trust, dedication, success |

**Source**: (Author’s own elaboration based on field study, 2023)
